# Supplementary material for: Evaluation of fluorine and sulfonic acid co-functionalized graphene oxide membranes under hydrogen proton exchange membrane fuel cell conditions
Source: Royal Society of Chemistry journal article supplement (doi:10.1039/c9se00126c), 2019-01-01
Supplement: c9se00126c1.pdf [file c9se00126c1.pdf]

### Supplementary information

## Evaluation of fluorine and Sulfonic acid co-functionalized graphene oxide membranes under hydrogen proton exchange membrane fuel cell conditions

Robin Sandström<sup>a</sup>, Alagappan Annamalai<sup>a</sup>, Nicolas Boulanger<sup>a</sup>, Joakim Ekspong<sup>a</sup>, Alexandr Talyzin<sup>a</sup>, Inge Mühlbacher<sup>b</sup>, Thomas Wågberg<sup>a,\*</sup>

<sup>a</sup>Department of Physics, Umeå University, Umeå 90187, Sweden

<sup>b</sup>Polymer Competence Center Leoben GmbH PCCL, Leoben 8700, Austria

### Pre-oxidation of flake graphite powder

Natural flake graphite (Sigma Aldrich, +100 mesh, Lot# MKBS2224V) was first pre-oxidized by mixing 3 g graphite powder together with 2.5 g Potassium persulfate ( $K_2S_2O_8$ ) and 2.5 g Phosphorous pentoxide ( $P_4O_{10}$ ) were dispersed in 24 ml concentrated Sulfuric acid (97-98%,  $H_2SO_4$ ). The mixture was maintained at 80 °C in an oil bath for 4 h under stirring, followed by washing through filtering with copious amounts of distilled water ( $H_2O$ )<sub>DI</sub> until a neutral pH was achieved. After completely drying the product in vacuum at 80 °C overnight, the pre-oxidized graphite was then used for synthesis of HGO, TGO\* and F-TGO.

### Synthesis of HGO

To synthesize HGO, 3 g the pre-oxidized graphite was dispersed in 120 ml  $H_2SO_4$  with 1.5 g Sodium nitrate ( $NaNO_3$ ) followed by a slow addition of 9 g of Potassium permanganate ( $KMnO_4$ ) via a funnel over the course of approximately 30 min under vigorous stirring in an ice bath. The reaction mixture was kept in the ice bath for 2 h after which the temperature was raised to 35 °C and maintained for an additional 2 h. Now, 120 ml of ( $H_2O$ )<sub>DI</sub> was carefully added upon which a strong exotherm was observed. After maintaining the mixture at a temperature of 98 °C for 15 min, an additional 300 ml  $H_2O$  was added followed by 18 ml Hydrogen peroxide ( $H_2O_2$ ). Thereafter the mixture was washed according to the same procedure as all other samples described in the manuscript.

### **Nafion (N211) pre-treatment**

All Nafion 211 membranes (N211) were pretreated before use. The treatment consisted of subsequent heating of the as-received membranes at 80 °C for 1 h each in (H<sub>2</sub>O)<sub>DI</sub>, 3 % H<sub>2</sub>O<sub>2</sub>, (H<sub>2</sub>O)<sub>DI</sub>, 0.5 M H<sub>2</sub>SO<sub>4</sub> and finally (H<sub>2</sub>O)<sub>DI</sub>. The membranes were then stored in (H<sub>2</sub>O)<sub>DI</sub> until usage.

### **Supporting characterization details**

Raman spectra were acquired by a Renishaw InVia Raman spectrometer with a laser excitation wavelength of 514 nm. Scanning electron microscopy imaging was performed with a Zeiss Merlin field emission SEM at 4 kV accelerating voltage and a current of 100 pA. Transmission electron microscopy was performed using a Jeol 1230 microscope (80 kV). Zeta potential measurements were performed with a Litesizer<sup>TM</sup> 500 (Anton Paar) by first diluting 200 µl of the 0.5 mg ml<sup>-1</sup> dispersions in 10 g of 1 mM KNO<sub>3</sub> solution where pH was adjusted with either 0.05 M KNO<sub>3</sub> or 0.05 M KOH. Data points considered obvious outliers (particularly those having high standard deviations) were removed followed by a polynomial fit to the second order for trend-comparison purposes. TGO\* could not be measured due to too large standard deviation at all pH.

Ion-exchange capacity (IEC) measurements were performed on the F-TGO and SF-TGO samples by first equilibrating the membranes in 1 M NaCl solution for 48 h. Thereafter a solution of 0.01 M NaOH was slowly added until neutralized. The IEC (in mmol/g), was then calculated according to:

$$IEC = \frac{\text{Consumed NaOH solution} * \text{NaOH concentration}}{\text{Membrane weight}} . \quad (S1)$$

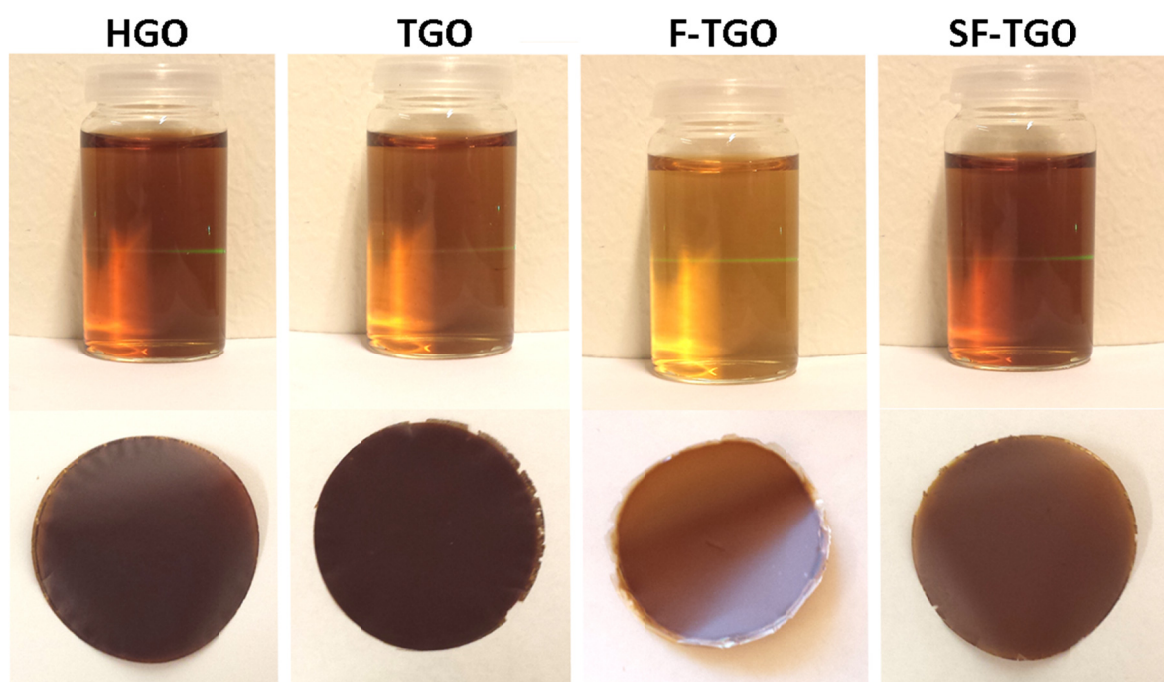

**Fig. S1.** Images depicting respective dispersions ( $0.5 \text{ mg ml}^{-1}$ ) and resulting membranes. TGO and TGO\* looked identical (visually).

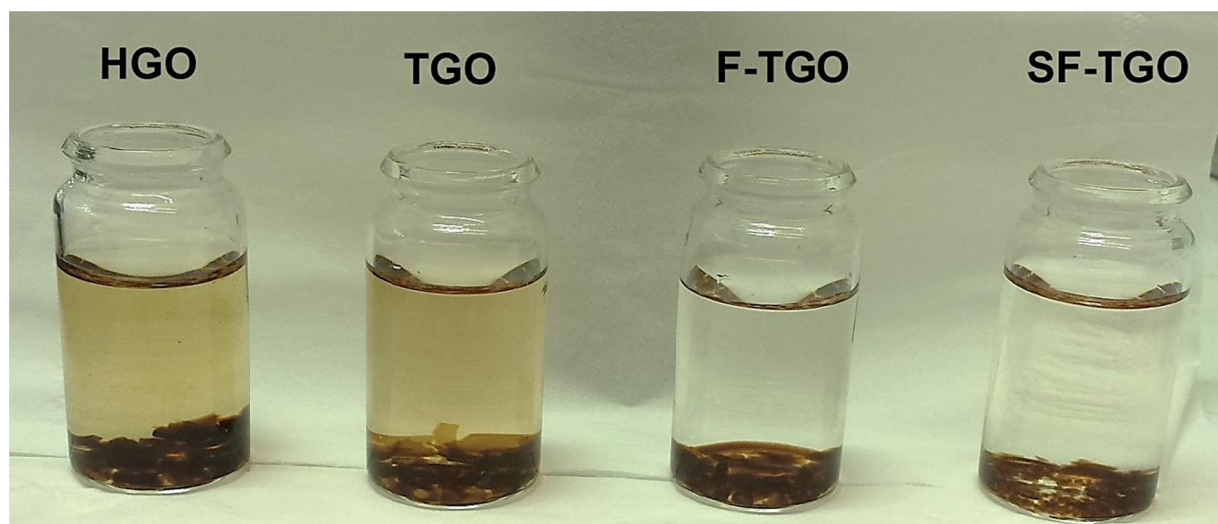

**Fig. S2.** Pieces of membranes stored for three (3) days in neutral water. HGO and TGO slowly visibly dispersed while F-TGO and SF-TGO remained stable. TGO\* had identical behavior as TGO.

**Table S1.** Average thicknesses as measured by a digital micrometer tool at various locations on the membrane. The variation for all membranes was about  $\pm 2 \mu\text{m}$ .

| HGO             | TGO             | TGO*            | F-TGO           | SF-TGO          |
|-----------------|-----------------|-----------------|-----------------|-----------------|
| $9 \mu\text{m}$ | $9 \mu\text{m}$ | $7 \mu\text{m}$ | $9 \mu\text{m}$ | $8 \mu\text{m}$ |

**Table S2.**  $2\theta$  Positions of the C(002) reflections. The position when membranes are soaked in  $(\text{H}_2\text{O})_{\text{DI}}$  are shown in parenthesis.

| HGO        | TGO        | TGO*       | F-TGO      | SF-TGO     |
|------------|------------|------------|------------|------------|
| 10.9 (6.0) | 10.9 (6.1) | 11.2 (5.5) | 10.3 (6.0) | 10.8 (6.1) |

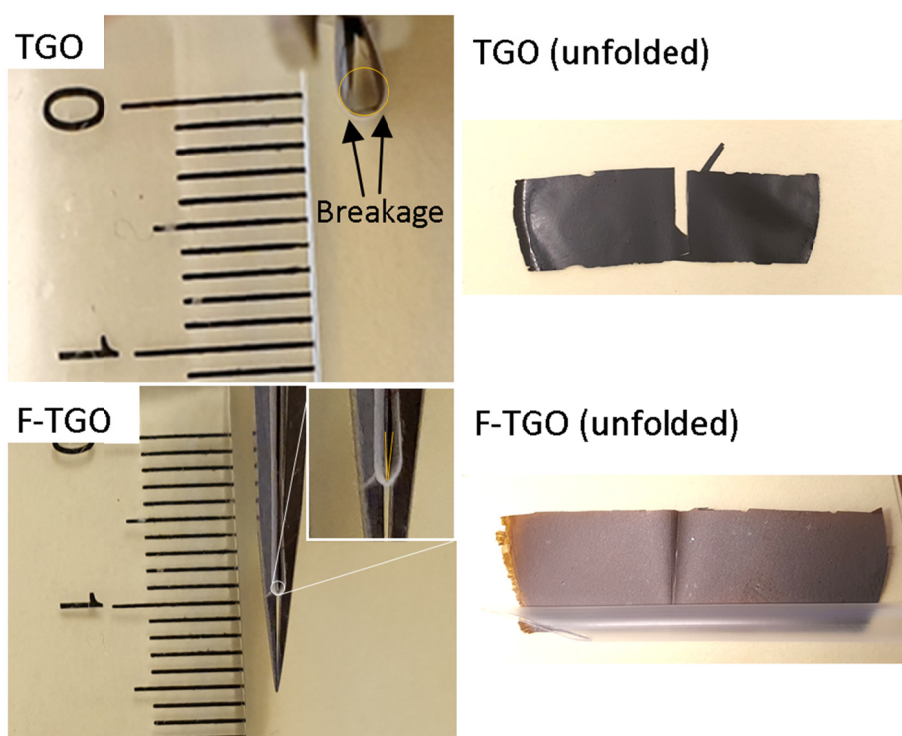

**Fig. S3.** Estimation of the bend radius of dry 1 cm wide strips of TGO (top) and F-TGO (bottom) by first encapsulating them with thin paper (baking paper) while slowly reducing the radius with a tweezer until breakage could be observed. For TGO, breakage was first observed at a bend radius of  $\sim 0.9 \text{ mm}$  whereas F-TGO could be completely folded with the tweezer without breakage as shown in the image of the unfolded strip. Thus, the flexibility and consequently the “handleability” was clearly improved as a result of fluorination.

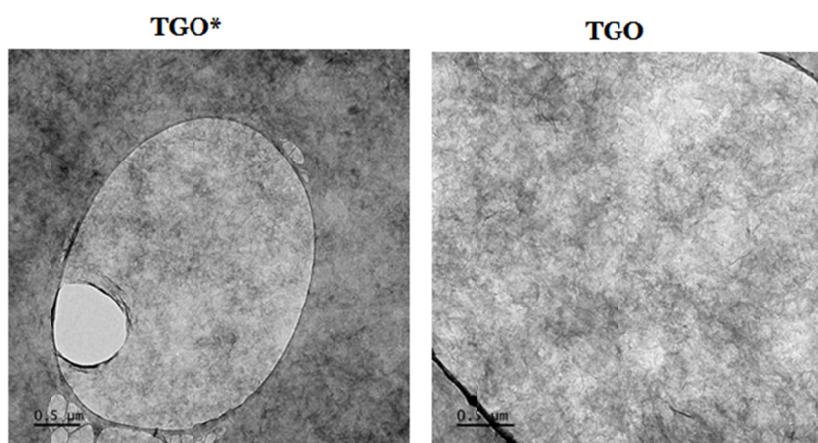

**Fig. S4.** TEM images comparing a TGO\* and TGO flake. TGO\* typically showed regions with perforated flakes such as in the presented image, possibly indicating that TGO\* was over oxidized.

**Table S3.** Summary of X-ray photoelectron spectroscopy data including atomic percentages given by the C 1s, F 1s and S 2p core-level regions.

|                     | Binding Energy [eV] | HGO [at. %] | TGO* [at. %] | TGO [at. %] | F-TGO [at. %] | SF-TGO [at. %] | Likely attributed species                                         |
|---------------------|---------------------|-------------|--------------|-------------|---------------|----------------|-------------------------------------------------------------------|
| C 1s                | 283,8               | 2,99        | 3,39         | 6,54        | 3,24          | 4,69           | Unidentified                                                      |
| C 1s                | 285,0               | 21,76       | 16,35        | 15,54       | 15,90         | 16,84          | C-CH, C=C                                                         |
| C 1s                | 287,0               | 37,64       | 35,44        | 37,11       | 40,34         | 39,67          | C-OH, epoxides                                                    |
| C 1s                | 288,4               | 3,51        | 3,93         | 4,82        | 3,97          | 3,99           | C=O                                                               |
| C 1s                | 289,1               | 2,56        | 4,05         | 2,04        | 3,51          | 1,28           | carboxyl                                                          |
| F 1s                | 686,5               | -           | -            | -           | 0,53          | 0,41           | Semi-ionic F, HF                                                  |
| S 2p <sub>3/2</sub> | 168,2               | 0,17        | 0,22         | 0,16        | 0,13          | 0,55           | SO <sub>3</sub> <sup>-</sup>                                      |
| S 2p <sub>3/2</sub> | 169,5               | 0,15        | 0,09         | 0,28        | 0,09          | -              | Protonated (SO <sub>3</sub> H or H <sub>2</sub> SO <sub>4</sub> ) |
| C/O ratio           | -                   | 2.2         | 1.7          | 2.0         | 2.1           | 2.1            | -                                                                 |

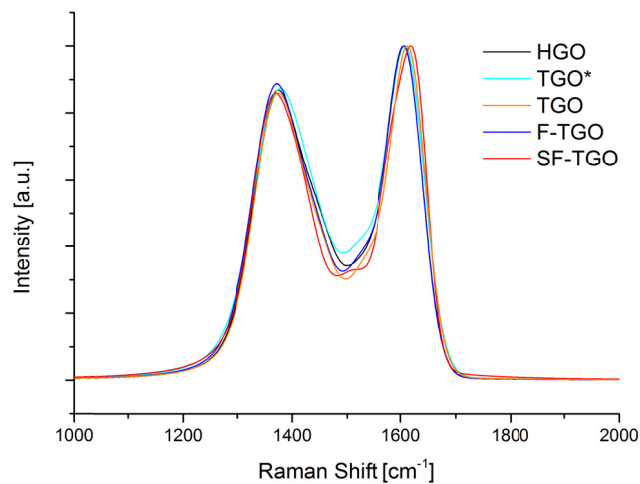

**Fig. S5.** Raman spectra (fitted with a four-peak model) showing near-identical D/G ratio ( $\sim 0.9$ ) for all samples. The methods sensitivity was not adequate to see an increased disorder in TGO\* despite the lower C/O ratio as measured by XPS.

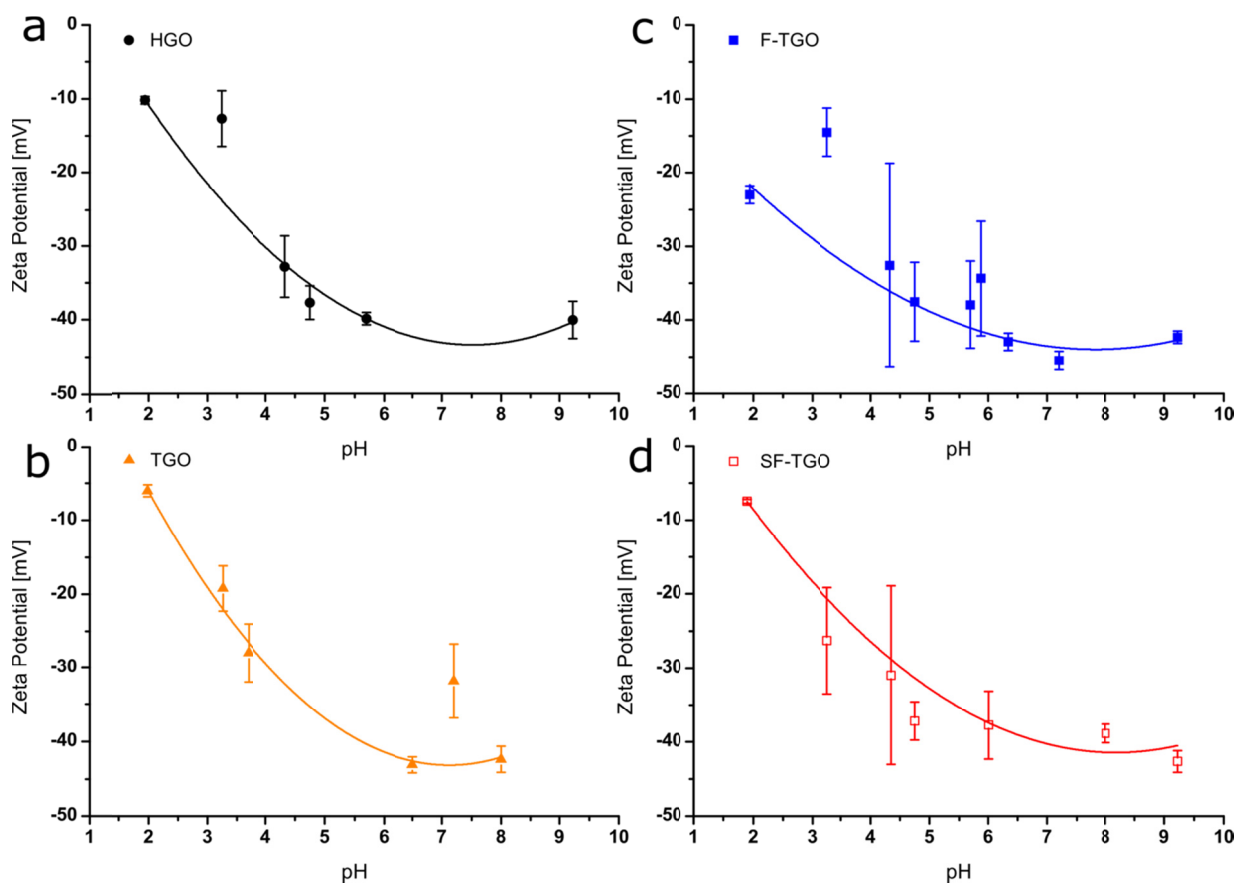

**Fig. S6.** Zeta potential measurements of respective dispersion. Outliers are removed and the trend shown are of a second order polynomial best-fit. TGO\* could not be measured.

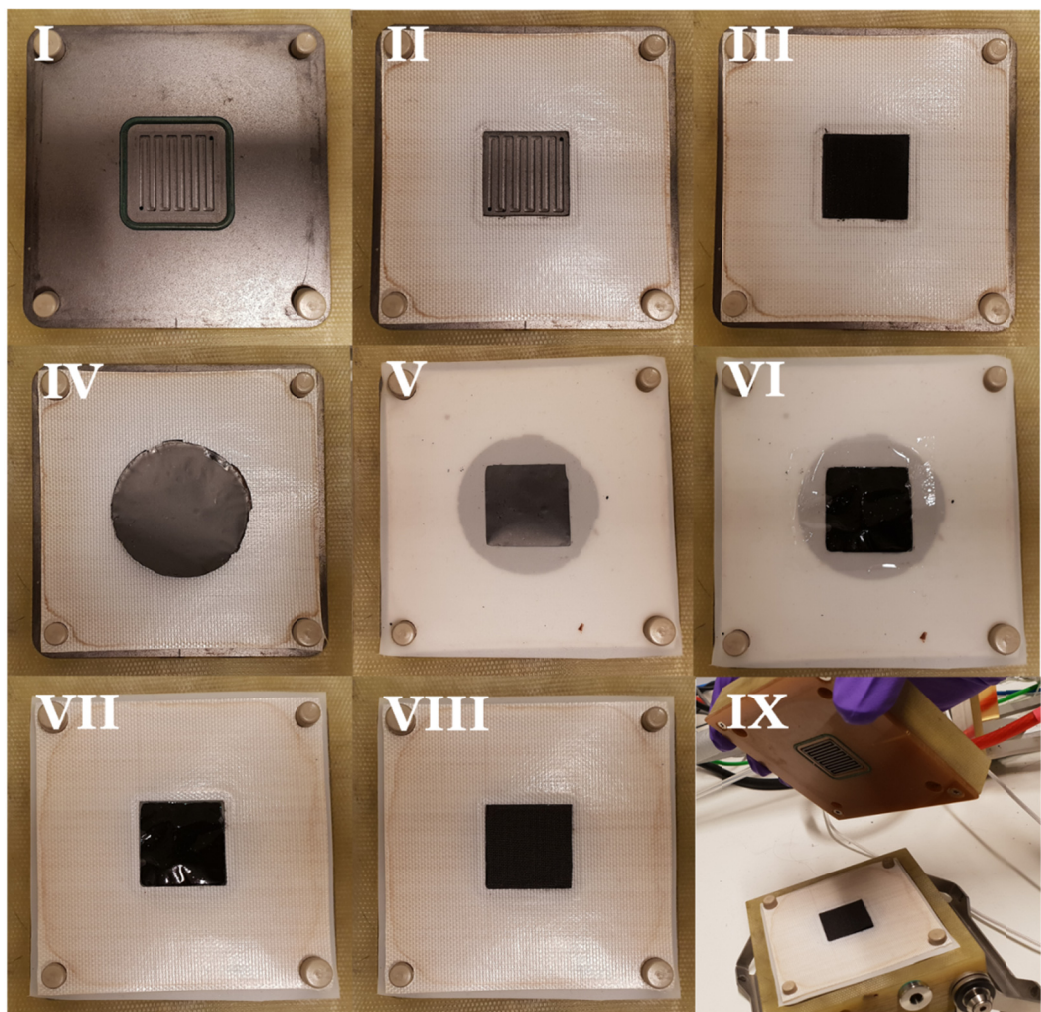

**Fig. S7.** MEA fabrication steps prior to recording the polarization curves in Fig. 6. First, the anode GDE was placed on the anodic flow field (current collector) and fixated with a teflonized fiberglass gasket (I-III). Second, The GO membrane was fixated with a thin silicon rubber gasket (IV-V). The N211 membrane could then be easily placed and fixated with an additional teflonized fiberglass gasket (VI-VII) and finally assembled together with the cathode GDE + flow fields (VIII-IX).

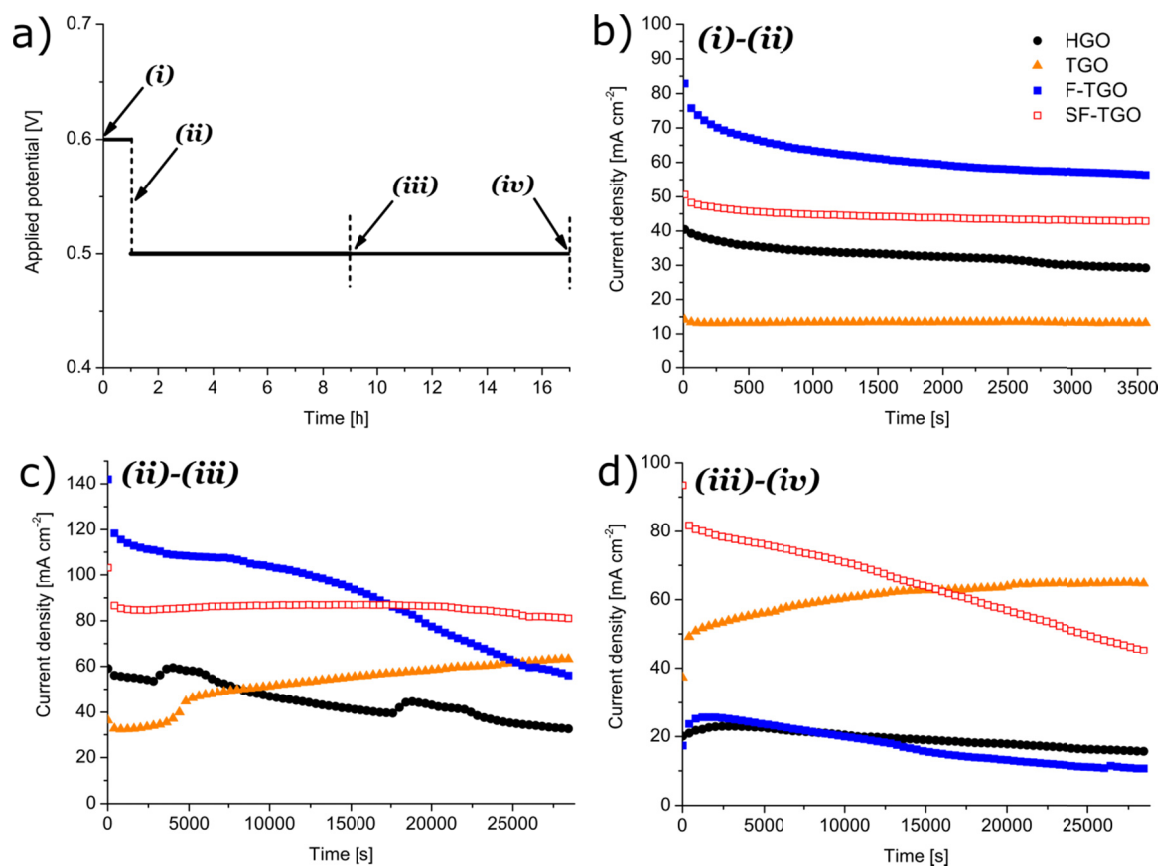

**Fig. S8.** Current vs. time curves (constant potential) corresponding to the four events (a) on which the polarization curves in Fig. 6 was recorded.

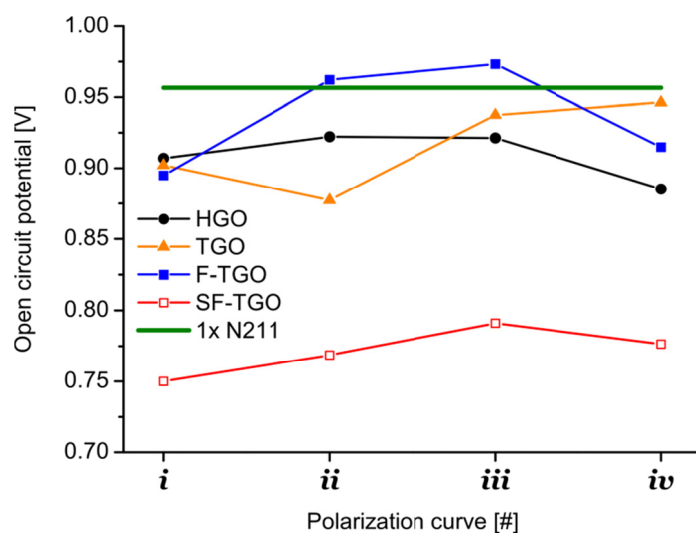

**Fig. S9.** Temporal evolution of the open circuit potential prior to respective deactivation shown in Fig. 6 and Fig. S8. Stable OCP of a single N211 membrane was measured to 0.957 V (green line).



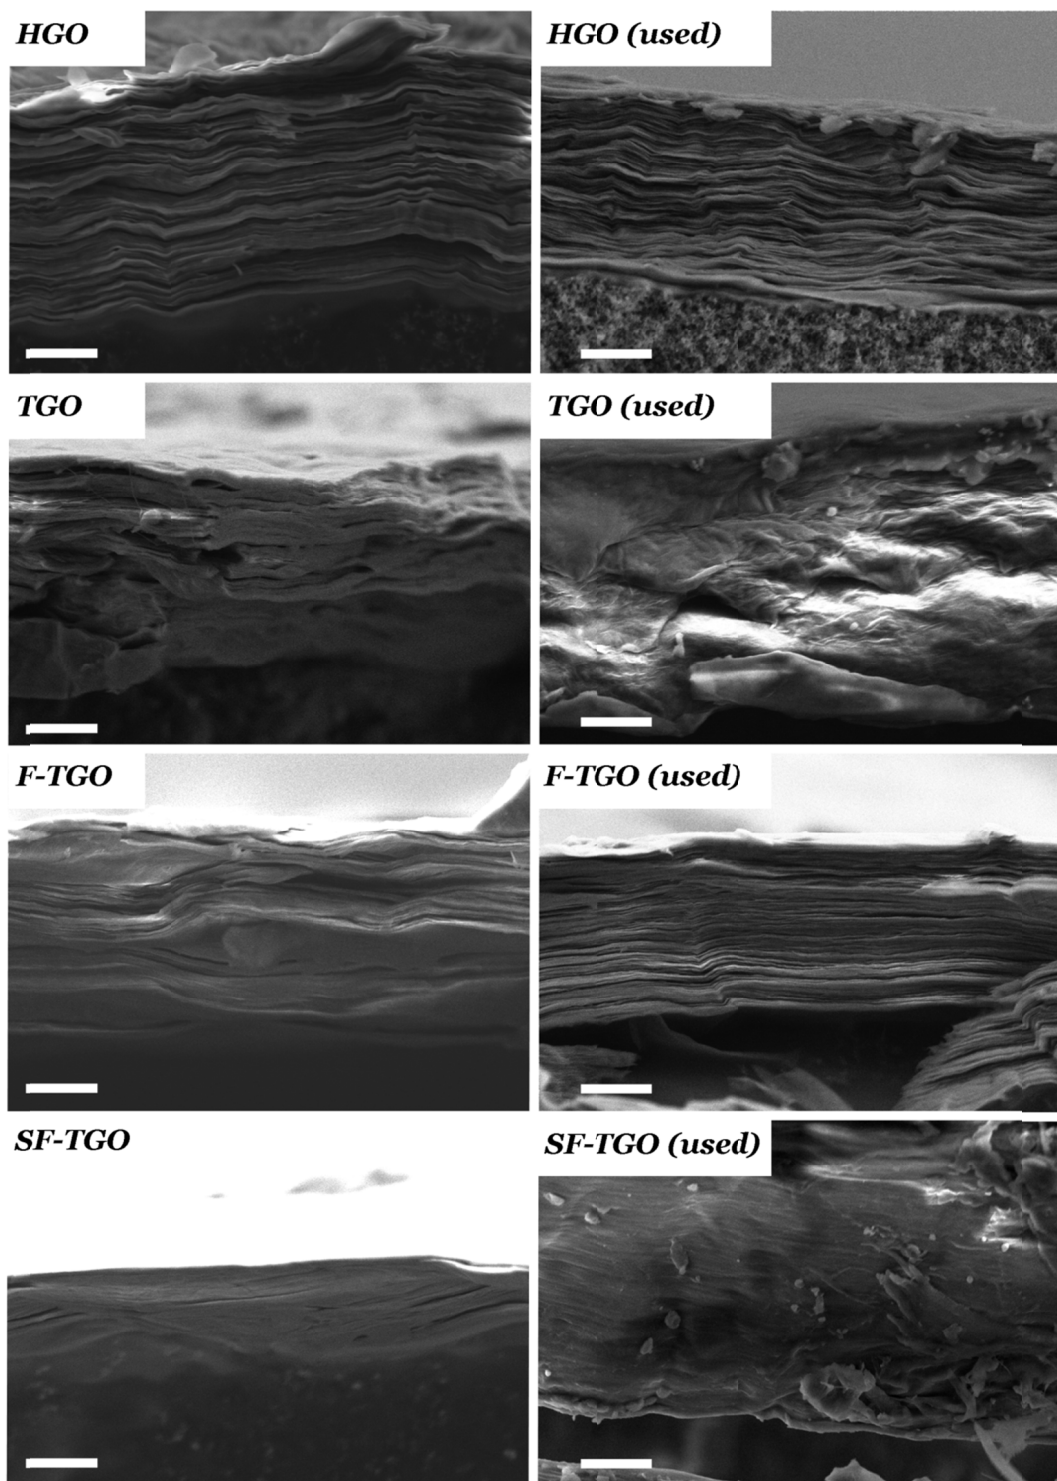

**Fig. S10.** SEM images of as-synthesized and used membranes after fuel cell operation (Scale bar: 2  $\mu\text{m}$ ). Images were acquired with an in chamber secondary electron detector. Charging effects in particularly SF-TGO caused imaging at higher resolution to be problematic, but rendered images clear enough for detection of severe disruptions to the laminar framework.

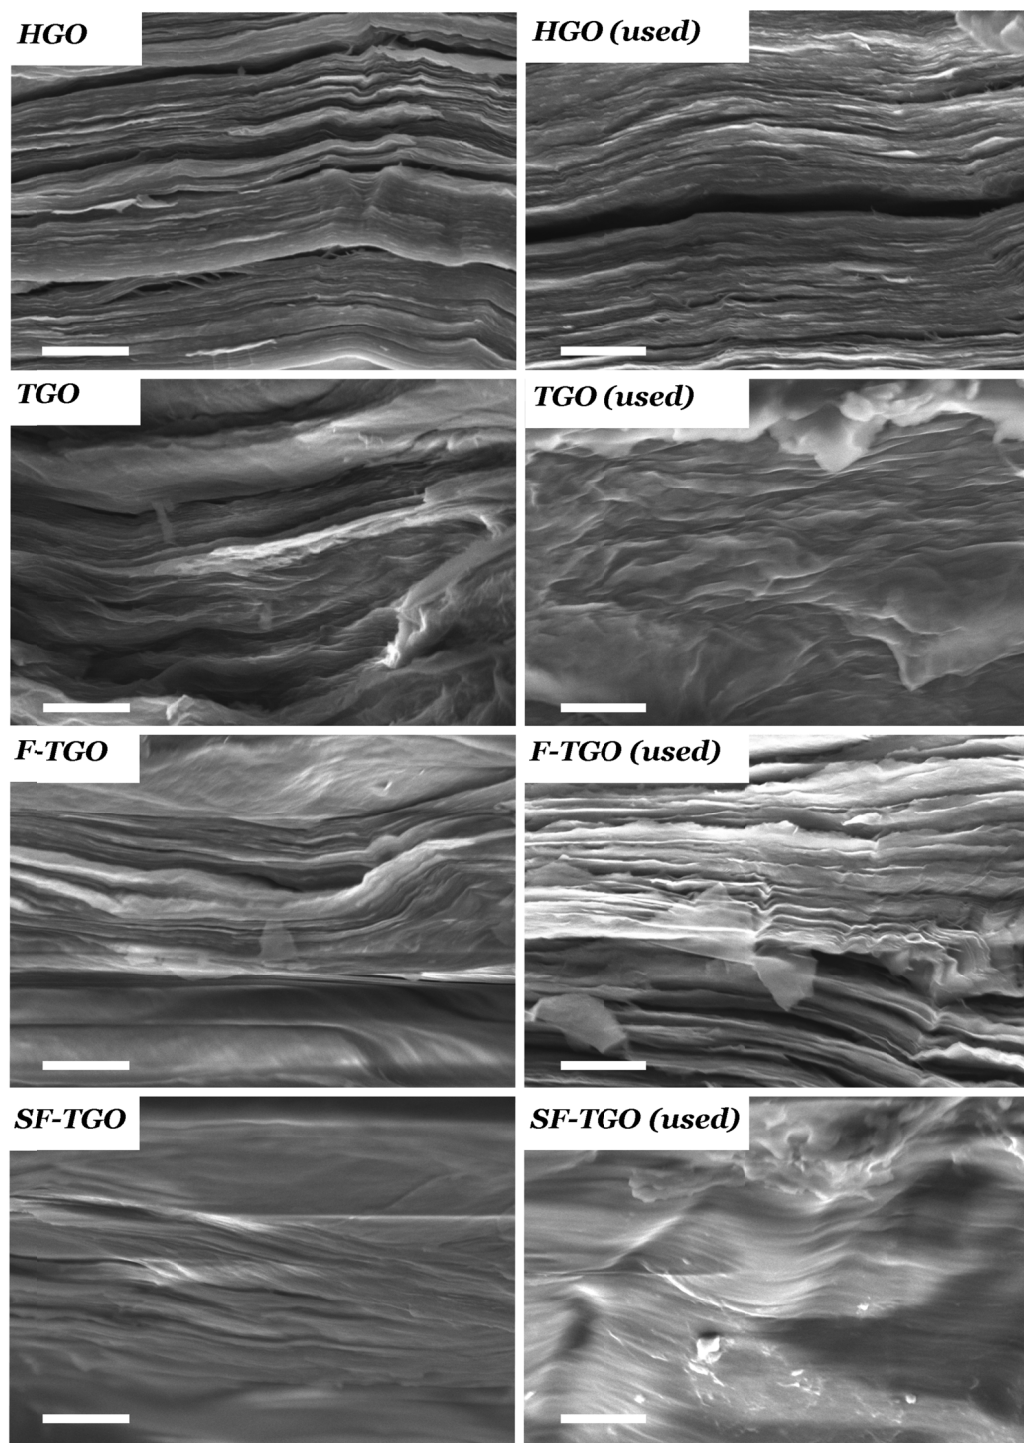

**Fig. S11.** SEM images of as-synthesized and used membranes after fuel cell operation (Scale bar: 1  $\mu\text{m}$ ). Images were acquired with an in lens secondary electron detector. Charging effects in particularly SF-TGO caused imaging at higher resolution to be problematic, but rendered images clear enough for detection of severe disruptions to the laminar framework.
